# Supplementary material for: Efficient SO2 capture by amine functionalized PEG
Source: Royal Society of Chemistry journal article supplement (doi:10.1039/c3cp52911h), 2013-01-01
Supplement: c3cp52911h.pdf [file c3cp52911h.pdf]

## **Electronic Supplementary Information**

### **Efficient SO<sub>2</sub> capture by amine functionalized PEG**

**Dezhong Yang, Minqiang Hou, Hui Ning, Jianling Zhang, Jun Ma, and Buxing Han\***

*Beijing National Laboratory for Molecular Science, CAS Key Laboratory of Colloid and Interface and Thermodynamics, Institute of Chemistry, Chinese Academy of Science, Beijing 100190, China.  
Fax: (+86) 010-62559373. E-mail: hanbx@iccas.ac.cn*

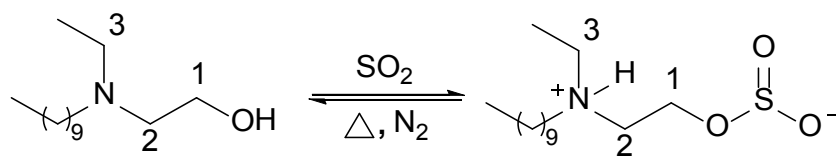

**Scheme S1.** The reaction between DEAE and  $\text{SO}_2$ .

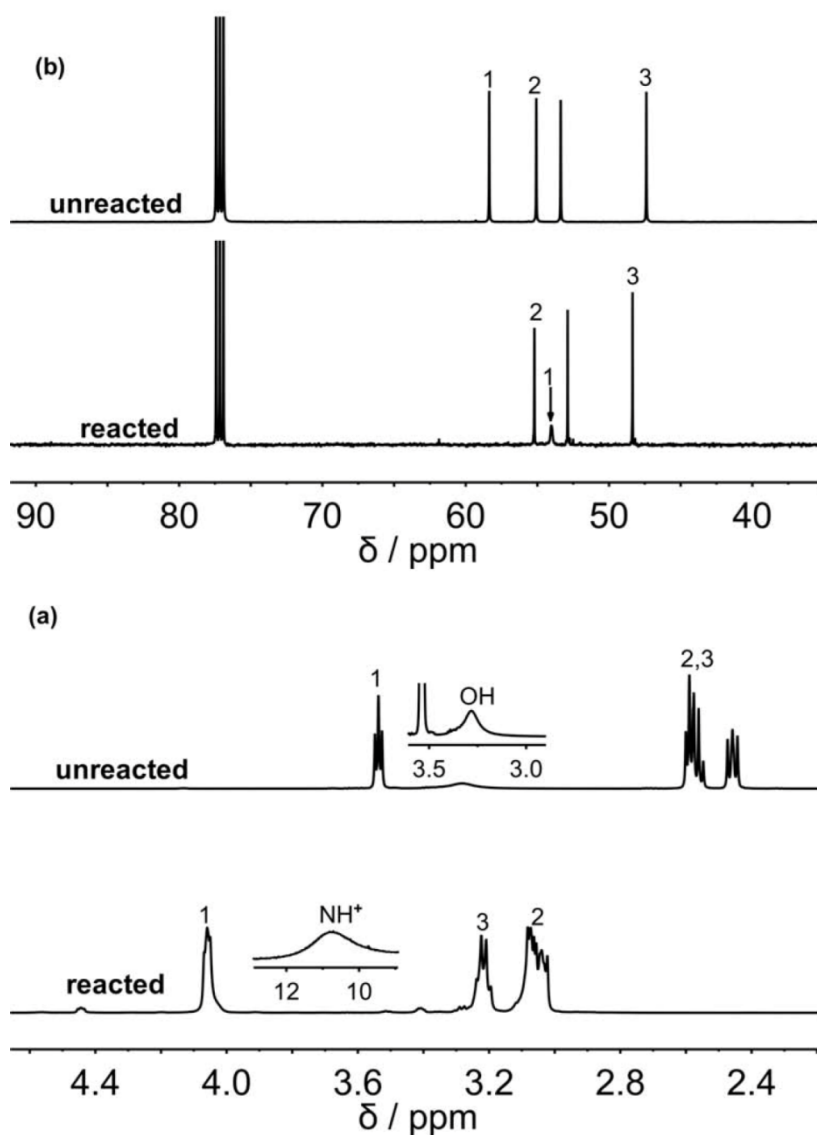

**Fig. S1** (a)  $^1\text{H}$  NMR (500 MHz,  $\text{CDCl}_3$ ) and (b)  $^{13}\text{C}$  NMR (125.8 MHz,  $\text{CDCl}_3$ ) spectra of DEAE before and after uptake of  $\text{SO}_2$ .

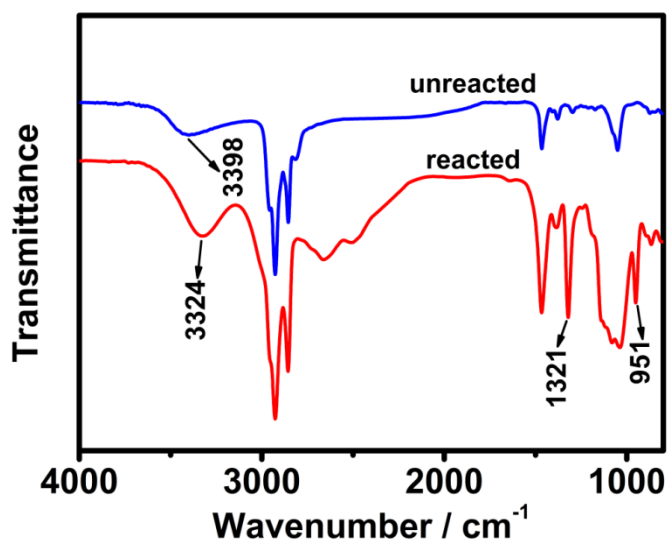

Fig. S2 FTIR spectra of DEAE before and after reaction with SO<sub>2</sub>.

Table S1. NMR data of DEAE with and without SO<sub>2</sub>.

| H/C   | DEAE           |                 | DEAE-SO <sub>2</sub> |                 |
|-------|----------------|-----------------|----------------------|-----------------|
|       | <sup>1</sup> H | <sup>13</sup> C | <sup>1</sup> H       | <sup>13</sup> C |
| 1     | 3.54           | 58.4            | 4.06                 | 54.0            |
| 2     | 2.58           | 55.1            | 3.06                 | 55.2            |
| 3     | 2.58           | 47.4            | 3.21                 | 48.4            |
| OH/NH | 3.28           | —               | 10.71                | —               |

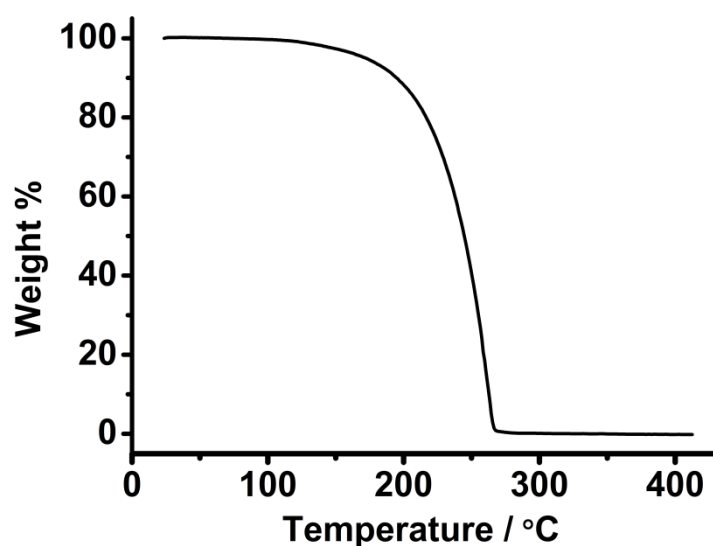

Fig. S3 Thermogram of the EE<sub>3</sub>AE at a heating rate of 10 °C/min.
